# Supplementary material
Source: MDPI journal article supplement (https://www.mdpi.com/1424-8247/15/10/1202)
Supplement: s1 [file s1]

# Neuroprotective Effect of Artichoke-Based Nanoformulation in Sporadic Alzheimer's Disease Mouse Model: Focus on Antioxidant, Anti-Inflammatory, and Amyloidogenic Pathways

Heba A. S. El-Nashar <sup>1</sup>, Haidy Abbas <sup>2</sup>, Mariam Zewail <sup>2</sup>, Mohamed H. Noureldin <sup>3</sup>, Mai M. Ali <sup>4</sup>, Marium M. Shamaa <sup>3</sup>, Mohamed A. Khattab <sup>5</sup> and Nehal Ibrahim <sup>1,\*</sup>

<sup>1</sup> Pharmacognosy Department, Faculty of Pharmacy, Ain Shams University, Cairo 11566, Egypt; heba\_pharma@pharma.asu.edu.eg (H.A.S.E.-N.); nehal.sabry@pharma.asu.edu.eg (N.I.)

<sup>2</sup> Department of Pharmaceutics, Faculty of Pharmacy, Damanhour University, Damanhour 22514, Egypt; haidy.abass@pharm.dmu.edu.eg (H.A.); mariamzewail@pharm.dmu.edu.eg (M.Z.)

<sup>3</sup> Department of Biochemistry, Division of Clinical and Biological Sciences, College of Pharmacy, Arab Academy for Science, Technology and Maritime Transport, Alexandria P.O. Box 1029, Egypt; mohamed.noureldin@aast.edu (M.H.N.); marium.muhammed@aast.edu (M.M.S.)

<sup>4</sup> Department of Pharmaceutics, Division of Pharmaceutical Sciences, College of Pharmacy, Arab Academy for Science, Technology and Maritime Transport, Alexandria P.O. Box 1029, Egypt; drmaiali@aast.edu (M.M.A.)

<sup>5</sup> Department of Cytology and Histology, Faculty of Veterinary Medicine, Cairo University, Cairo 12211, Egypt; mabdelrazik@cu.edu.eg

\* Correspondence: nehal.sabry@pharma.asu.edu.eg

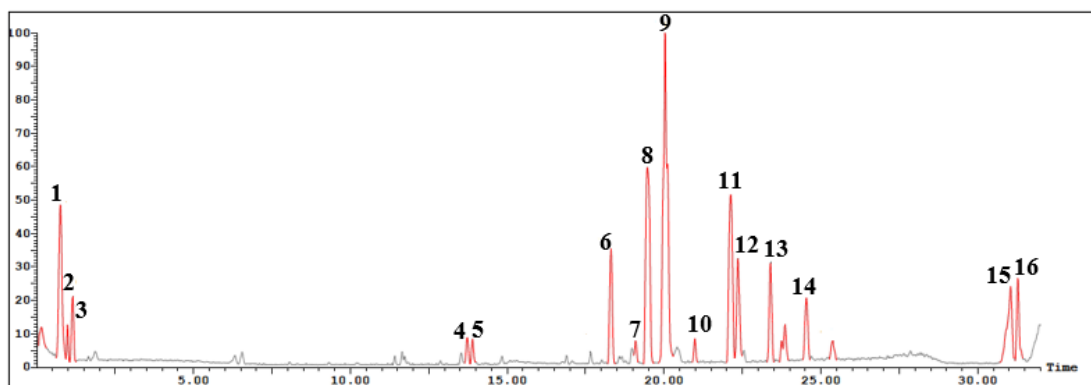

**Figure S1.** Total ion chromatogram (TIC) of the methanolic extract of *C. cardunculus* L. bracts. Peaks numbers follow those listed in Table 1.
